# Supplementary material
Source: PubMed Central journal article supplement (PMC3165711)
Supplement: supp_193_18_4881__1.pdf [file supp_193_18_4881__1.pdf]

## Ali et. al, Supplementary microarray data

|                                             |                                                                                                                                                                                                                                                                                                                                                                  |
|---------------------------------------------|------------------------------------------------------------------------------------------------------------------------------------------------------------------------------------------------------------------------------------------------------------------------------------------------------------------------------------------------------------------|
| AGILENT PROBE ID                            | This is the name of the probe as given by Agilent, the manufacturer of the array. The array employed here is the commercially available "E. coli" array with the catalog/design number 020097.                                                                                                                                                                   |
| POSITION OF PROBE START IN BL21(DE3) GENOME | This indicates the nucleotide at which the sequence of the oligonucleotide probe on the array begins on the BL21(DE3) genome using the numbering scheme used for Genbank file CP001509.3                                                                                                                                                                         |
| LOCUS ID IN BL21(DE3) GENOME                | The locus ID of the gene to which the probe is specific using the names present in the CP001509.3 genbank annotation                                                                                                                                                                                                                                             |
| GENE NAME                                   | the common shorthand name of the gene                                                                                                                                                                                                                                                                                                                            |
| ALTERNATIVE GENE NAME                       | an alternative gene name                                                                                                                                                                                                                                                                                                                                         |
| FOLD CHANGE FIVE POINT FIVE                 | the observed fold change (average Cy3 signal vs. Cy5 signal) when transcripts from the 5.5 expressing strain (Cy3) is compared to the empty plasmid strain (Cy5). <b>Boxes highlighted in RED are transcripts that displayed increased levels after expression of 5.5. Blue indicates decreased transcript levels.</b>                                           |
| FOLD CHANGE HNS (1to64)                     | the observed fold change (average Cy3 signal vs. Cy5 signal) when transcripts from the truncated H-NS expressing strain (Cy3) is compared to the empty plasmid strain (Cy5). <b>Boxes highlighted in RED are transcripts that displayed increased levels after expression of H-NS truncation (amino acids 1-64). Blue indicates decreased transcript levels.</b> |
| GENE PRODUCT DESCRIPTION                    | a brief description of gene function                                                                                                                                                                                                                                                                                                                             |
| PROBE IDENTITY TO BL21 SEQUENCE             | The sequence of each probe was compared to the BL21(DE3) genome using BLAST and the percent identity of the probe to the genome sequence is shown. Probes with less than 90% identity are shaded in gray.                                                                                                                                                        |

| AGILENT PROBE ID | POSITION OF PROBE START IN BL21(DE3) |           | LOCUS ID IN BL21(DE3) GENOME | GENE NAME | ALTERNATIVE GENE NAME | FOLD CHANGE     | FOLD CHANGE                                                               | GENE PRODUCT DESCRIPTION | PROBE IDENTITY TO BL21 SEQUENCE |
|------------------|--------------------------------------|-----------|------------------------------|-----------|-----------------------|-----------------|---------------------------------------------------------------------------|--------------------------|---------------------------------|
|                  | BL21(DE3) GENOME                     | GENOME    |                              |           |                       | FIVE POINT FIVE | HNS (1to64)                                                               |                          |                                 |
| A_07_P010704     | 2239                                 | ECD_00002 | thrA                         | thrA      | 16.89                 |                 | bifunctional aspartokinase I/homoserine dehydrogenase I                   | 98.33                    |                                 |
| A_07_P010763     | 13645                                | ECD_00014 | dnaK                         | dnaK      | -6.1                  | 7.97            | molecular chaperone DnaK                                                  | 100                      |                                 |
| A_07_P010766     | 14299                                | ECD_00015 | dnaJ                         | dnaJ      | -5.77                 | 4.41            | chaperone Hsp40, co-chaperone with DnaK                                   | 100                      |                                 |
| A_07_P049110     | 19719                                | ECD_00020 | -                            | Z0020     | 12.09                 | 11.68           | hypothetical protein                                                      | 96.67                    |                                 |
| A_07_P059386     | 21024                                | ECD_00021 | -                            | ECs0022   | 11.85                 | 14.13           | putative usher protein                                                    | 96.49                    |                                 |
| A_07_P010806     | 25391                                | ECD_00028 | yaaY                         | yaaY      | 3.46                  | 2.9             | hypothetical protein                                                      | 100                      |                                 |
| A_07_P011063     | 87973                                | ECD_00078 | leuO                         | leuO      | 25.89                 | 9.18            | leucine transcriptional activator                                         | 100                      |                                 |
| A_07_P002766     | 184515                               | ECD_00160 | degP                         | degP      |                       | -4.06           | serine endoprotease (protease Do), membrane-associated                    | 100                      |                                 |
| A_07_P002875     | 207787                               | ECD_00181 | rnhB                         | rnhB      |                       | -4.25           | ribonuclease HII                                                          | 96.67                    |                                 |
| A_07_P003008     | 240913                               | ECD_00209 | yafT                         | yafT      | 20.99                 | 8.41            | predicted aminopeptidase                                                  | 100                      |                                 |
| A_07_P048086     | 242905                               | ECD_00213 | yhhI-1                       | Z2254     | 13.31                 | 22.64           | predicted transposase                                                     | 91.67                    |                                 |
| A_07_P007845     | 250885                               | ECD_00221 | dinJ                         | dinJ      |                       | 3.42            | predicted antitoxin of YafQ-DinJ toxin-antitoxin system                   | 98.33                    |                                 |
| A_07_P007889     | 258005                               | ECD_00230 | ykfJ                         | ykfJ      |                       | 5.16            | hypothetical protein                                                      | 100                      |                                 |
| A_07_P051892     | 258300                               | ECD_00231 | prfH                         | prfH      |                       | 3.02            | peptide chain release factor 2                                            | 98.33                    |                                 |
| A_07_P008129     | 273639                               | ECD_00246 | yagU                         | yagU      |                       | 4.27            | conserved inner membrane protein                                          | 96.43                    |                                 |
| A_07_P008155     | 280135                               | ECD_00251 | yagY                         | matC      | 8.46                  | 2.99            | hypothetical protein                                                      | 100                      |                                 |
| A_07_P008156     | 280679                               | ECD_00252 | yagZ                         | matB      | 26.07                 | 13.23           | hypothetical protein                                                      | 100                      |                                 |
| A_07_P008164     | 281004                               | ECD_00253 | ykgK                         | matA      | 16.15                 | 8.86            | predicted regulator                                                       | 100                      |                                 |
| A_07_P008172     | 282828                               | ECD_00255 | ykgM                         | ykgM      | 5.33                  |                 | 50S ribosomal protein L31                                                 | 100                      |                                 |
| A_07_P053817     | 285630                               | ECD_00256 | eaeH                         | ECs0336   | 3.07                  | 2.36            | attaching and effacing protein, pathogenesis factor                       | 95                       |                                 |
| A_07_P008206     | 288030                               | ECD_00259 | ykgI                         | ykgI      | 11.52                 | 11.69           | hypothetical protein                                                      | 100                      |                                 |
| A_07_P008213     | 288389                               | ECD_00260 | ykgC                         | ykgC      | 7.8                   | 4.86            | pyridine nucleotide-disulfide oxidoreductase                              | 100                      |                                 |
| A_07_P008225     | 291575                               | ECD_00262 | ykgE                         | ykgE      |                       | 6.93            | predicted oxidoreductase                                                  | 100                      |                                 |
| A_07_P008226     | 293013                               | ECD_00263 | ykgF                         | ykgF      | 6.24                  | 9.91            | predicted amino acid dehydrogenase with NAD(P)-binding domain and ferric  | 100                      |                                 |
| A_07_P008233     | 293846                               | ECD_00264 | ykgG                         | ykgG      |                       | 3.76            | predicted transporter                                                     | 100                      |                                 |
| A_07_P008239     | 294152                               | ECD_00265 | -                            | b0309     | 11.78                 | 6.49            | hypothetical protein                                                      | 100                      |                                 |
| A_07_P008244     | 294438                               | ECD_00266 | ykgH                         | ykgH      | 37.6                  | 22.27           | predicted inner membrane protein                                          | 100                      |                                 |
| A_07_P008268     | 303028                               | ECD_00271 | yahA                         | yahA      | 8.17                  | 3.25            | predicted DNA-binding transcriptional regulator                           | 100                      |                                 |
| A_07_P043691     | 305052                               | ECD_00274 | yahD                         | yahD      |                       | 6.32            | predicted transcriptional regulator with ankyrin domain                   | 100                      |                                 |
| A_07_P008292     | 307795                               | ECD_00276 | yahF                         | yahF      |                       | 3.53            | predicted acyl-CoA synthetase with NAD(P)-binding domain and succinyl-CoA | 95                       |                                 |
| A_07_P008325     | 314395                               | ECD_00281 | yahL                         | yahL      |                       | 9.09            | hypothetical protein                                                      | 100                      |                                 |
| A_07_P008330     | 315181                               | ECD_00282 | yahM                         | yahM      | 8.24                  |                 | hypothetical protein                                                      | 100                      |                                 |
| A_07_P031022     | 325372                               | ECD_00290 | codB                         | codB      |                       | -3.45           | cytosine transporter                                                      | 100                      |                                 |
| A_07_P008378     | 326517                               | ECD_00291 | codA                         | codA      |                       | -3.4            | cytosine deaminase                                                        | 100                      |                                 |
| A_07_P020975     | 356048                               | ECD_00320 | -                            | b0370     | 4.96                  |                 | hypothetical protein                                                      | 100                      |                                 |
| A_07_P020980     | 357379                               | ECD_00321 | yaiT                         | yaiT      | 5.97                  | 2.48            | conserved hypothetical protein                                            | 100                      |                                 |
| A_07_P021023     | 366031                               | ECD_00329 | yaiB                         | iraP      |                       | 7.19            | hypothetical protein                                                      | 100                      |                                 |
| A_07_P021254     | 415222                               | ECD_00379 | cyoE                         | cyoE      | 3.09                  |                 | protoheme IX farnesyltransferase                                          | 100                      |                                 |
| A_07_P051941     | 415466                               | ECD_00380 | cyoD                         | cyoD      | 3.41                  |                 | cytochrome o ubiquinol oxidase subunit IV                                 | 98.33                    |                                 |
| A_07_P021406     | 449205                               | ECD_00411 | hha                          | hha       | 19.84                 | 16.51           | modulator of gene expression, with H-NS                                   | 100                      |                                 |
| A_07_P021411     | 449448                               | ECD_00412 | ybaJ                         | ybaJ      | 18.23                 | 30.73           | hypothetical protein                                                      | 100                      |                                 |
| A_07_P041529     | 481167                               | ECD_00436 | ybaS                         | ybaS      |                       | 4.38            | predicted glutaminase                                                     | 95                       |                                 |

| AGILENT PROBE ID | POSITION OF PROBE START IN |                  | GENE NAME | ALTERNATIVE GENE NAME | FOLD CHANGE | FOLD        | GENE PRODUCT DESCRIPTION                                   | PROBE IDENTITY TO BL21 SEQUENCE |
|------------------|----------------------------|------------------|-----------|-----------------------|-------------|-------------|------------------------------------------------------------|---------------------------------|
|                  | BL21(DE3)                  | LOCUS ID IN      |           |                       | FIVE POINT  | CHANGE      |                                                            |                                 |
|                  | GENOME                     | BL21(DE3) GENOME |           |                       | FIVE        | HNS (1to64) |                                                            |                                 |
| A_07_P016279     | 496982                     | ECD_00449        | ybbC      | ybbC                  | 21.76       | 70.12       | hypothetical protein                                       | 100                             |
| A_07_P016283     | 497678                     | ECD_00450        | ylbH      | ylbH                  | 78.56       | 59.99       | conserved protein, rhs-like protein                        | 100                             |
| A_07_P016287     | 497938                     | ECD_00451        | ybbD      | ybbD                  | 96.84       | 41.68       | hypothetical protein                                       | 100                             |
| A_07_P016340     | 506775                     | ECD_00460        | ybbV      | b0510                 |             | 3.46        | hypothetical protein                                       | 100                             |
| A_07_P016343     | 508166                     | ECD_00461        | allP      | ybbW                  | 7.29        | 12.61       | predicted allantoin transporter                            | 100                             |
| A_07_P016349     | 509459                     | ECD_00462        | allB      | allB                  | 13.52       | 7.87        | allantoinase                                               | 100                             |
| A_07_P016437     | 527782                     | ECD_00480        | sfmA      | sfmA                  | 4.05        | 5.21        | predicted fimbrial-like adhesin protein                    | 100                             |
| A_07_P016452     | 532001                     | ECD_00483        | sfmH      | sfmH                  |             | 3.49        | predicted fimbrial-like adhesin protein                    | 100                             |
| A_07_P016465     | 533141                     | ECD_00485        | fimZ      | fimZ                  |             | 3.13        | predicted DNA-binding transcriptional regulator            | 98.33                           |
| A_07_P056700     | 535652                     | ECD_00488        | -         | ECs0805               | 5.14        | -3.28       | conserved hypothetical protein                             | 95.65                           |
| A_07_P035397     | 537042                     | ECD_00493        | emrE      | emrE                  |             | 4.67        | multidrug efflux protein                                   | 96.67                           |
| A_07_P016486     | 538964                     | ECD_00494        | ybcK      | ybcK                  | 4.19        | 5.97        | predicted recombinase                                      | 100                             |
| A_07_P016493     | 539918                     | ECD_00495        | ybcL      | ybcL                  | 14.78       | 17.05       | predicted kinase inhibitor                                 | 100                             |
| A_07_P016496     | 540652                     | ECD_00496        | ybcM      | ybcM                  | 7.51        | 5.48        | predicted DNA-binding transcriptional regulator            | 100                             |
| A_07_P053132     | 543243                     | ECD_00503        | #N/A      | ECs3104               | 1.84        | 5.59        | #N/A                                                       | 91.67                           |
| A_07_P016781     | 598807                     | ECD_00574        | ahpC      | ahpC                  | 3.05        | 2.07        | alkyl hydroperoxide reductase, C22 subunit                 | 100                             |
| A_07_P015809     | 617765                     | ECD_00593        | cspE      | cspC                  | 2.82        | 7.99        | cold shock protein E                                       | 87.5                            |
| A_07_P009714     | 620855                     | ECD_00598        | ybeF      | ybeF                  | 5.36        | 2.12        | predicted DNA-binding transcriptional regulator            | 100                             |
| A_07_P044030     | 636835                     | ECD_00613        | ybeQ      | Z0793                 | 4.96        | 13.83       | PSEUDOGENE - hypothetical - similar to b0644               | 100                             |
| A_07_P009794     | 637591                     | ECD_00614        | ybeR      | ybeR                  |             | 8.17        | hypothetical protein                                       | 100                             |
| A_07_P010017     | 691084                     | ECD_00658        | rhsC      | rhsC                  |             | 4.69        | rhsC element core protein RshC                             | 100                             |
| A_07_P010028     | 691388                     | ECD_00659        | ybfB      | ybfB                  | 12.89       | 13.5        | predicted inner membrane protein                           | 100                             |
| A_07_P010033     | 693075                     | ECD_00660        | ybfO      | ybfO                  | 3.11        | 4.31        | conserved protein, rhs-like protein                        | 100                             |
| A_07_P063004     | 693636                     | ECD_00661        | ybfC      | ECs0730               | 10.7        | 10.47       | hypothetical protein                                       | 98.33                           |
| A_07_P010326     | 695687                     | ECD_00665        | yhhI-3    | ybfQ                  | 45.9        | 36.71       | PSEUDOGENE - hypothetical - similar to b3484 (transposase) | 97.87                           |
| A_07_P010047     | 697433                     | ECD_00666        | ybfD      | ybfD                  | 16.72       | 13.76       | hypothetical protein                                       | 95                              |
| A_07_P063010     | 697703                     | ECD_00667        | ybgA      | ECs0732               | 2.33        | 4.48        | hypothetical protein                                       | 98.25                           |
| A_07_P046286     | 712162                     | ECD_00680        | gltA      | gltA                  | 6.85        |             | citrate synthase                                           | 100                             |
| A_07_P010185     | 731548                     | ECD_00692        | cydA      | cydA                  | 1.92        | 4.28        | cytochrome d terminal oxidase, subunit I                   | 100                             |
| A_07_P053006     | 756222                     | ECD_10010        | -         | ECs3004               | 6.64        | -3.17       | hypothetical protein                                       | 98.31                           |
| A_07_P053004     | 756383                     | ECD_10011        | -         | ECs3003               | 5.59        | -3.46       | hypothetical protein                                       | 98.33                           |
| A_07_P052976     | 758422                     | ECD_10016        | cIII      | ECs2998               |             | -3.34       | antitermination protein                                    | 98.33                           |
| A_07_P062064     | 761231                     | ECD_10023        | cII       | ECs1187               | 4.15        | -2.49       | antitermination protein                                    | 100                             |
| A_07_P043403     | 761862                     | ECD_10024        | O         | Z0311                 |             | -3.02       | DNA replication protein                                    | 100                             |
| A_07_P056737     | 763739                     | ECD_10026        | ren       | ECs0813               |             | -4.54       | ren exclusion protein                                      | 96.67                           |
| A_07_P055902     | 764046                     | ECD_10027        | Q         | ECs3501               |             | -4.12       | late gene regulator                                        | 100                             |
| A_07_P016554     | 767160                     | ECD_10033        | -         | ybcV                  | 3.42        | 2.71        | putative envelope protein                                  | 98.28                           |
| A_07_P016559     | 767853                     | ECD_10034        | -         | ybcW                  | 9.9         | 2.16        | hypothetical protein                                       | 100                             |
| A_07_P030399     | 770716                     | ECD_10036        | A         | c_3173                | 8.19        | -3.29       | DNA packaging protein                                      | 100                             |
| A_07_P050550     | 771203                     | ECD_10037        | W         | Z1884                 | 6.05        | -2.98       | head-tail joining protein                                  | 94.92                           |
| A_07_P050567     | 774681                     | ECD_10041        | E         | Z1888                 |             | 4.06        | capsid component                                           | 100                             |
| A_07_P033485     | 805415                     | ECD_00754        | ybhM      | ybhM                  |             | 4.52        | conserved inner membrane protein                           | 93.33                           |

| AGILENT PROBE ID | POSITION OF PROBE START IN |                              | GENE NAME | ALTERNATIVE GENE NAME | FOLD CHANGE     | FOLD               | GENE PRODUCT DESCRIPTION                                                      | PROBE IDENTITY TO BL21 SEQUENCE |
|------------------|----------------------------|------------------------------|-----------|-----------------------|-----------------|--------------------|-------------------------------------------------------------------------------|---------------------------------|
|                  | BL21(DE3) GENOME           | LOCUS ID IN BL21(DE3) GENOME |           |                       | FIVE POINT FIVE | CHANGE HNS (1to64) |                                                                               |                                 |
| A_07_P004515     | 832802                     | ECD_00779                    | dps       | dps                   | -3.72           |                    | DNA protection during starvation conditions                                   | 100                             |
| A_07_P004620     | 859037                     | ECD_00800                    | yliE      | yliE                  | 9.97            | 3.3                | conserved inner membrane protein                                              | 98.33                           |
| A_07_P033669     | 884964                     | ECD_00839                    | -         | c_0961                | 5.23            | 7.64               | putative phage tail protein                                                   | 96.43                           |
| A_07_P005092     | 991081                     | ECD_00933                    | ompF      | ompF                  | 3.64            | 7.33               | outer membrane porin 1a (Ia;B;F)                                              | 100                             |
| A_07_P005137     | 1003362                    | ECD_00942                    | ycbQ      | ycbQ                  | 5.54            | 16.98              | predicted fimbrial-like adhesin protein                                       | 100                             |
| A_07_P005145     | 1004171                    | ECD_00943                    | ycbR      | ycbR                  | 3.33            | 3.14               | predicted periplasmic pilin chaperone                                         | 100                             |
| A_07_P005180     | 1011227                    | ECD_00950                    | ycbW      | ycbW                  |                 | 5.22               | hypothetical protein                                                          | 100                             |
| A_07_P005192     | 1016701                    | ECD_00953                    | uup       | uup                   |                 | -3.64              | fused predicted transporter subunits of ABC superfamily: ATP-binding comp     | 100                             |
| A_07_P005216     | 1021211                    | ECD_00958                    | fabA      | fabA                  |                 | -4.5               | 3-hydroxydecanoyl-ACP dehydratase                                             | 100                             |
| A_07_P005240     | 1025561                    | ECD_00962                    | sulA      | sulA                  | 18.38           |                    | SOS cell division inhibitor                                                   | 100                             |
| A_07_P005282     | 1034058                    | ECD_00971                    | yccW      | yccW                  |                 | -3.44              | predicted methyltransferase                                                   | 100                             |
| A_07_P005364     | 1051126                    | ECD_00987                    | ymcA      | gfcD                  | -1.5            | 4.66               | hypothetical protein                                                          | 100                             |
| A_07_P005392     | 1055863                    | ECD_00992                    | cspG      | cspG                  |                 | 14.67              | DNA-binding transcriptional regulator                                         | 100                             |
| A_07_P001189     | 1056304                    | ECD_00993                    | sfa       | ymcE                  |                 | 3.7                | cold shock protein                                                            | 100                             |
| A_07_P010343     | 1056458                    | ECD_00994                    | gnsA      | gnsA                  |                 | 3.73               | predicted regulator of phosphatidylethanolamine synthesis                     | 100                             |
| A_07_P001226     | 1067118                    | ECD_01002                    | yccD      | cbpM                  |                 | 3.91               | modulator of CbpA co-chaperone                                                | 100                             |
| A_07_P001235     | 1067630                    | ECD_01003                    | cbpA      | cbpA                  |                 | 7.09               | curved DNA-binding protein, DnaJ-like protein that functions as a co-chaperon | 100                             |
| A_07_P001240     | 1069460                    | ECD_01004                    | yccE      | yccE                  | 22.94           | 71.67              | hypothetical protein                                                          | 98.33                           |
| A_07_P033937     | 1070934                    | ECD_01005                    | agp       | c_1138                | 2.42            | 4.8                | glucose-1-phosphatase/inositol phosphatase                                    | 98.33                           |
| A_07_P001401     | 1104442                    | ECD_01035                    | csgF      | csgF                  | 5.94            |                    | predicted transport protein                                                   | 100                             |
| A_07_P001409     | 1104832                    | ECD_01036                    | csgE      | csgE                  | 5.76            | 3.08               | predicted transport protein                                                   | 100                             |
| A_07_P001412     | 1105190                    | ECD_01037                    | csgD      | csgD                  | 9.39            | 4.69               | DNA-binding transcriptional activator in two-component regulatory system      | 100                             |
| A_07_P001417     | 1106897                    | ECD_01038                    | csgB      | csgB                  | 29.45           | 12.07              | curlin nucleator protein, minor subunit in curli complex                      | 100                             |
| A_07_P060575     | 1107317                    | ECD_01039                    | csgA      | ECs1420               | 5.04            | 2.38               | cryptic curlin major subunit                                                  | 87.5                            |
| A_07_P001429     | 1107766                    | ECD_01040                    | csgC      | csgC                  | 3.97            | 2.28               | predicted curli production protein                                            | 100                             |
| A_07_P001431     | 1108211                    | ECD_01041                    | ymdA      | ymdA                  | 3.19            |                    | hypothetical protein                                                          | 100                             |
| A_07_P001504     | 1123335                    | ECD_01056                    | yceP      | bssS                  |                 | 10.03              | hypothetical protein                                                          | 98.33                           |
| A_07_P001568     | 1133712                    | ECD_01069                    | flgB      | flgB                  |                 | 3.92               | flagellar basal-body rod protein B                                            | 98.33                           |
| A_07_P001612     | 1142462                    | ECD_01078                    | flgK      | flgK                  |                 | -7.08              | flagellar hook-associated protein K                                           | 100                             |
| A_07_P001620     | 1143460                    | ECD_01079                    | flgL      | flgL                  |                 | -7.77              | flagellar hook-associated protein L                                           | 100                             |
| A_07_P006752     | 1199967                    | ECD_01135                    | ycgW      | elbA                  | 8.43            | 28.24              | hypothetical protein                                                          | 98.33                           |
| A_07_P006759     | 1201044                    | ECD_01136                    | ycgX      | ycgX                  |                 | 4.07               | hypothetical protein                                                          | 100                             |
| A_07_P006771     | 1204123                    | ECD_01139                    | ycgZ      | ycgZ                  |                 | 3.7                | hypothetical protein                                                          | 100                             |
| A_07_P006777     | 1204342                    | ECD_01140                    | ymgA      | ymgA                  | 5.48            | 6.2                | hypothetical protein                                                          | 100                             |
| A_07_P041114     | 1205014                    | ECD_01142                    | ymgC      | ABR-0081754           | 17.63           | 27.13              | hypothetical protein                                                          | 96.43                           |
| A_07_P006792     | 1206951                    | ECD_01143                    | ycgG      | ycgG                  |                 | 3.44               | conserved inner membrane protein                                              | 100                             |
| A_07_P010359     | 1207300                    | ECD_01144                    | ymgF      | ymgF                  | 3.64            | 7.51               | hypothetical protein                                                          | 100                             |
| A_07_P006798     | 1209099                    | ECD_01145                    | ycgH      | b1169                 | 113             | 50.42              | PSEUDOGENE - in frame stop - similar to b4491                                 | 100                             |
| A_07_P006821     | 1212497                    | ECD_01149                    | minE      | minE                  | 5.53            |                    | cell division topological specificity factor MinE                             | 100                             |
| A_07_P006827     | 1213210                    | ECD_01150                    | minD      | minD                  | 3.68            |                    | membrane ATPase of the MinC-MinD-MinE system                                  | 100                             |
| A_07_P006864     | 1217874                    | ECD_01157                    | hlyE      | hlyE                  | 12.82           | 11.17              | PSEUDOGENE - in frame stop - similar to b1182                                 | 100                             |
| A_07_P007124     | 1280369                    | ECD_01213                    | hns       | hns                   | 4.64            | 3.13               | global DNA-binding transcriptional dual regulator H-NS                        | 96.55                           |

| AGILENT PROBE ID | POSITION OF PROBE START IN |                              | GENE NAME | ALTERNATIVE GENE NAME | FOLD CHANGE     | FOLD               | GENE PRODUCT DESCRIPTION                                        | PROBE IDENTITY TO BL21 SEQUENCE |
|------------------|----------------------------|------------------------------|-----------|-----------------------|-----------------|--------------------|-----------------------------------------------------------------|---------------------------------|
|                  | BL21(DE3) GENOME           | LOCUS ID IN BL21(DE3) GENOME |           |                       | FIVE POINT FIVE | CHANGE HNS (1to64) |                                                                 |                                 |
| A_07_P007151     | 1288346                    | ECD_01217                    | oppA      | oppA                  | 8.74            |                    | oligopeptide transporter subunit                                | 100                             |
| A_07_P007157     | 1289352                    | ECD_01218                    | oppB      | oppB                  | 13.29           |                    | oligopeptide permease ABC transporter membrane protein          | 100                             |
| A_07_P007165     | 1289870                    | ECD_01219                    | oppC      | oppC                  | 16.36           |                    | oligopeptide transporter subunit                                | 100                             |
| A_07_P007166     | 1290957                    | ECD_01220                    | oppD      | oppD                  | 8.89            |                    | oligopeptide transporter ATP-binding component                  | 100                             |
| A_07_P007204     | 1297534                    | ECD_01227                    | yciA      | yciA                  | 7.87            | -3.16              | predicted hydrolase                                             | 96.67                           |
| A_07_P007225     | 1300373                    | ECD_01231                    | yciE      | yciE                  | 30.47           | 17.92              | hypothetical protein                                            | 100                             |
| A_07_P007235     | 1301672                    | ECD_01233                    | yciG      | yciG                  |                 | 3.92               | hypothetical protein                                            | 100                             |
| A_07_P014396     | 1329664                    | ECD_01260                    | osmB      | osmB                  | 1.78            | 5.4                | lipoprotein                                                     | 100                             |
| A_07_P058509     | 1356689                    | ECD_01286                    | ycjM      | ECs1886               |                 | 3.51               | predicted glucosyltransferase                                   | 100                             |
| A_07_P058535     | 1369403                    | ECD_01297                    | ycjW      | ECs1899               |                 | 3.59               | predicted DNA-binding transcriptional regulator                 | 95                              |
| A_07_P062776     | 1389249                    | ECD_01315                    | abgA      | ECs1922               |                 | -3.84              | predicted peptidase, aminobenzoyl-glutamate utilization protein | 98.33                           |
| A_07_P014705     | 1397439                    | ECD_01322                    | intR      | intR                  | 5.25            | 2.45               | integrase                                                       | 100                             |
| A_07_P014742     | 1402708                    | ECD_01331                    | sieB      | sieB                  | 5.36            | 5.6                | phage superinfection exclusion protein                          | 100                             |
| A_07_P014748     | 1402865                    | ECD_01332                    | ydaF      | b1354                 | 6.1             | 3.4                | predicted protein                                               | 90                              |
| A_07_P016531     | 1403267                    | ECD_01334                    | -         | essD                  | 6.04            | 2.42               | putative Lysozyme                                               | 94.55                           |
| A_07_P014792     | 1406508                    | ECD_01339                    | trkG      | trkG                  | 35.82           | 60.64              | potassium transporter subunit                                   | 96.67                           |
| A_07_P014801     | 1406860                    | ECD_01340                    | ynaK      | ynaK                  | 2.75            | 4.57               | conserved hypothetical protein                                  | 100                             |
| A_07_P038648     | 1408034                    | ECD_01343                    | -         | c_1594                | 2.6             | 3.57               | conserved hypothetical protein                                  | 100                             |
| A_07_P030273     | 1408248                    | ECD_01344                    | -         | c_3147                | 4.62            | 4.65               | conserved hypothetical protein                                  | 95.56                           |
| A_07_P014850     | 1408754                    | ECD_01345                    | pinR      | pinR                  | 3.37            | 4.42               | predicted site-specific recombinase                             | 98.33                           |
| A_07_P014851     | 1409718                    | ECD_01346                    | ynaE      | ynaE                  | 5.84            | 11.9               | predicted DNA-binding transcriptional regulator                 | 100                             |
| A_07_P058811     | 1412343                    | ECD_01348                    | ompN      | ECs1999               | 10.28           | 9.09               | outer membrane pore protein N, non-specific                     | 100                             |
| A_07_P009130     | 1430378                    | ECD_01362                    | ydbD      | ydbD                  |                 | 3.54               | hypothetical protein                                            | 98.18                           |
| A_07_P009133     | 1431454                    | ECD_01363                    | ynbA      | ynbA                  |                 | 3.5                | predicted inner membrane protein                                | 100                             |
| A_07_P009140     | 1432269                    | ECD_01364                    | ynbB      | ynbB                  | 3.56            | 5.66               | predicted CDP-diglyceride synthase                              | 100                             |
| A_07_P009204     | 1448270                    | ECD_01379                    | ydcI      | ydcI                  |                 | -3.44              | predicted DNA-binding transcriptional regulator                 | 100                             |
| A_07_P048121     | 1481156                    | ECD_01412                    | yncH      | Z2264                 | 3.49            | 6.33               | hypothetical protein                                            | 100                             |
| A_07_P009372     | 1485904                    | ECD_01414                    | rhsE      | rhsE                  |                 | 13.51              | rhsE element core protein RshE                                  | 100                             |
| A_07_P009376     | 1486342                    | ECD_01415                    | ydcD      | ydcD                  | 52.67           | 313.28             | hypothetical protein                                            | 100                             |
| A_07_P009383     | 1487253                    | ECD_01416                    | -         | b1458                 | 20.29           | 61.58              | hypothetical protein                                            | 100                             |
| A_07_P009389     | 1487603                    | ECD_01417                    | -         | yncI                  | 6.55            | 14.86              | hypothetical protein                                            | 100                             |
| A_07_P009396     | 1488838                    | ECD_01419                    | ydcE      | pptA                  | 8.34            | 18.76              | 4-oxalocrotonate tautomerase                                    | 100                             |
| A_07_P009499     | 1512192                    | ECD_01440                    | osmC      | osmC                  |                 | 3.14               | osmotically inducible, stress-inducible membrane protein        | 100                             |
| A_07_P009584     | 1538466                    | ECD_01457                    | ydeO      | ydeO                  | 9.99            | 10.1               | predicted DNA-binding transcriptional activator                 | 98.33                           |
| A_07_P009587     | 1539328                    | ECD_01458                    | -         | yncN                  | 9.66            | 13.88              | hypothetical protein                                            | 100                             |
| A_07_P009593     | 1539784                    | ECD_01459                    | ydeP      | ydeP                  | 25.93           | 8.97               | predicted oxidoreductase                                        | 100                             |
| A_07_P009596     | 1542360                    | ECD_01460                    | ydeQ      | ydeQ                  | 8.4             | 6.63               | predicted fimbrial-like adhesin protein                         | 100                             |
| A_07_P020327     | 1573574                    | ECD_01495                    | ydeI      | ydeI                  |                 | 3.88               | hypothetical protein                                            | 100                             |
| A_07_P020333     | 1574114                    | ECD_01496                    | ydeJ      | ydeJ                  |                 | 10.03              | competence damage-inducible protein A                           | 100                             |
| A_07_P020361     | 1580485                    | ECD_01502                    | ydfJ      | b1543                 | 7.82            | 3.69               | predicted transporter                                           | 100                             |
| A_07_P038191     | 1583930                    | ECD_01505                    | -         | c_1471                | 6.72            | 6.25               | conserved hypothetical protein                                  | 98.33                           |
| A_07_P030282     | 1584813                    | ECD_01507                    | -         | c_3149                | 40.78           | 46.17              | conserved hypothetical protein                                  | 98.33                           |

| AGILENT PROBE ID | POSITION OF PROBE START IN |                              | GENE NAME | ALTERNATIVE GENE NAME | FOLD CHANGE     | FOLD               | GENE PRODUCT DESCRIPTION                                                   | PROBE IDENTITY TO BL21 SEQUENCE |
|------------------|----------------------------|------------------------------|-----------|-----------------------|-----------------|--------------------|----------------------------------------------------------------------------|---------------------------------|
|                  | BL21(DE3) GENOME           | LOCUS ID IN BL21(DE3) GENOME |           |                       | FIVE POINT FIVE | CHANGE HNS (1to64) |                                                                            |                                 |
| A_07_P020626     | 1618282                    | ECD_01568                    | ydgE      | mdtI                  |                 | 6.49               | multidrug efflux system transporter                                        | 100                             |
| A_07_P044393     | 1618533                    | ECD_01569                    | ydgF      | Z2594                 |                 | 3.2                | multidrug efflux system transporter                                        | 96.61                           |
| A_07_P054884     | 1637113                    | ECD_01584                    | uidC      | ECs2322               |                 | 5.25               | predicted outer membrane porin protein                                     | 100                             |
| A_07_P042333     | 1680667                    | ECD_01626                    | sodB      | sodB                  |                 | 4.93               | superoxide dismutase, Fe                                                   | 98.25                           |
| A_07_P018430     | 1700315                    | ECD_01644                    | ydhZ      | ydhZ                  | 3.26            | 2.47               | hypothetical protein                                                       | 100                             |
| A_07_P018508     | 1718065                    | ECD_01660                    | ydiN      | ydiN                  |                 | 3.71               | predicted transporter                                                      | 98.33                           |
| A_07_P018523     | 1721462                    | ECD_01663                    | ydiF      | ydiF                  |                 | 3.06               | fused predicted acetyl-CoA:acetoacetyl-CoA transferase: alpha subunit/beta | 100                             |
| A_07_P018534     | 1722901                    | ECD_01665                    | ydiP      | ydiP                  |                 | 3.66               | predicted DNA-binding transcriptional regulator                            | 93.33                           |
| A_07_P018587     | 1735979                    | ECD_01676                    | ydiV      | ydiV                  |                 | 3.08               | hypothetical protein                                                       | 100                             |
| A_07_P018627     | 1743939                    | ECD_01685                    | rplT      | rplT                  |                 | 3.01               | 50S ribosomal protein L20                                                  | 100                             |
| A_07_P018633     | 1744365                    | ECD_01686                    | rpmI      | rpmI                  |                 | 3.45               | 50S ribosomal protein L35                                                  | 100                             |
| A_07_P018641     | 1745313                    | ECD_01688                    | thrS      | thrS                  | 3.57            | 2.14               | threonyl-tRNA synthetase                                                   | 100                             |
| A_07_P018654     | 1749339                    | ECD_01689                    | -         | b1721                 | 6.94            | 8.87               | PSEUDOGENE - arpB - b1720                                                  | 100                             |
| A_07_P018674     | 1753008                    | ECD_01694                    | yniA      | yniA                  |                 | 3.16               | predicted phosphotransferase/kinase                                        | 100                             |
| A_07_P018698     | 1756937                    | ECD_01699                    | ydjO      | ydjO                  | 7.25            | 10.75              | hypothetical protein                                                       | 100                             |
| A_07_P018721     | 1763166                    | ECD_01704                    | celD      | chbR                  | 6.27            | 3.41               | DNA-binding transcriptional dual regulator                                 | 100                             |
| A_07_P018739     | 1765948                    | ECD_01707                    | celA      | chbB                  |                 | 5.81               | N,N'-diacetylchitobiose-specific enzyme IIB component of PTS               | 100                             |
| A_07_P018898     | 1798540                    | ECD_01739                    | ydjF      | ydjF                  | 6.99            | 6.22               | predicted DNA-binding transcriptional regulator                            | 100                             |
| A_07_P018910     | 1800784                    | ECD_01741                    | ydjH      | ydjH                  |                 | 5.03               | predicted kinase                                                           | 100                             |
| A_07_P018915     | 1801371                    | ECD_01742                    | ydjI      | ydjI                  |                 | 4.02               | predicted aldolase                                                         | 100                             |
| A_07_P018919     | 1802245                    | ECD_01743                    | ydjJ      | ydjJ                  |                 | 3.09               | predicted oxidoreductase, Zn-dependent and NAD(P)-binding                  | 100                             |
| A_07_P015590     | 1808057                    | ECD_01748                    | gapA      | gapA                  | -3.12           | 3.17               | glyceraldehyde-3-phosphate dehydrogenase                                   | 100                             |
| A_07_P021405     | 1814431                    | ECD_01753                    | yeaH      | maa                   | 8.2             | 4.91               | hypothetical protein                                                       | 100                             |
| A_07_P015616     | 1816036                    | ECD_01754                    | yeaI      | yeaI                  | 11.62           | 5.15               | predicted diguanylate cyclase                                              | 100                             |
| A_07_P015721     | 1835854                    | ECD_01776                    | yeaY      | yeaY                  | 2.2             | -3.36              | predicted lipoprotein                                                      | 100                             |
| A_07_P015761     | 1843553                    | ECD_01784                    | sdaA      | sdaA                  |                 | -3.34              | L-serine deaminase I                                                       | 100                             |
| A_07_P009684     | 1853049                    | ECD_01793                    | cspC      | cspE                  | 7.56            | 3.39               | stress protein, member of the CspA-family                                  | 87.5                            |
| A_07_P015812     | 1854109                    | ECD_01795                    | yebO      | yebO                  |                 | 3.21               | hypothetical protein                                                       | 96.67                           |
| A_07_P016041     | 1903021                    | ECD_01844                    | torY      | torY                  |                 | 5.18               | TMAO reductase III (TorYZ), cytochrome c-type subunit                      | 100                             |
| A_07_P015227     | 1947966                    | ECD_01889                    | yodB      | yodB                  | 2.33            | 4.43               | predicted cytochrome                                                       | 100                             |
| A_07_P015234     | 1949475                    | ECD_01890                    | yeel      | mtfA                  | 3.61            |                    | hypothetical protein                                                       | 100                             |
| A_07_P015265     | 1962654                    | ECD_01895                    | yeeN      | yeeN                  | 3.85            | 8.02               | hypothetical protein                                                       | 100                             |
| A_07_P053639     | 1973124                    | ECD_01904                    | insD      | ECs0288               | 3.51            | 5.99               | IS2 insertion element transposase InsAB'                                   | 89.19                           |
| A_07_P015420     | 1986407                    | ECD_01921                    | hisG      | hisG                  |                 | 8.75               | ATP phosphoribosyltransferase                                              | 96.55                           |
| A_07_P015421     | 1987174                    | ECD_01922                    | hisD      | hisD                  |                 | 10.03              | histidinol dehydrogenase                                                   | 100                             |
| A_07_P015429     | 1989155                    | ECD_01923                    | hisC      | hisC                  |                 | 5.96               | histidinol-phosphate aminotransferase                                      | 100                             |
| A_07_P015435     | 1990215                    | ECD_01924                    | hisB      | hisB                  |                 | 3.71               | imidazole glycerol-phosphate dehydratase/histidinol phosphatase            | 96.49                           |
| A_07_P015440     | 1990754                    | ECD_01925                    | hisH      | hisH                  |                 | 3.51               | imidazole glycerol phosphate synthase subunit HisH                         | 96.67                           |
| A_07_P062811     | 1991473                    | ECD_01926                    | hisA      | ECs2825               |                 | 3.29               | 1-(5-phosphoribosyl)-5-[(5- phosphoribosylamino)methylideneamino] imida:   | 100                             |
| A_07_P055562     | 1994420                    | ECD_01930                    | ugd       | ECs2829               | 25.54           |                    | UDP-glucose 6-dehydrogenase                                                | 96.55                           |
| A_07_P015470     | 1995726                    | ECD_01931                    | gnd       | gnd                   | 3.18            |                    | 6-phosphogluconate dehydrogenase                                           | 98.33                           |
| A_07_P055651     | 1998157                    | ECD_01932                    | manB      | ECs2853               | 13.98           | 7.06               | Phosphomannomutase                                                         | 100                             |

| AGILENT PROBE ID | POSITION OF PROBE START IN |                              | GENE NAME | ALTERNATIVE GENE NAME | FOLD CHANGE     | FOLD CHANGE | GENE PRODUCT DESCRIPTION                                                     | PROBE IDENTITY TO BL21 SEQUENCE |
|------------------|----------------------------|------------------------------|-----------|-----------------------|-----------------|-------------|------------------------------------------------------------------------------|---------------------------------|
|                  | BL21(DE3) GENOME           | LOCUS ID IN BL21(DE3) GENOME |           |                       | FIVE POINT FIVE | HNS (1to64) |                                                                              |                                 |
| A_07_P032034     | 2016357                    | ECD_01951                    | wcaK      | wcaK                  |                 | 3.51        | predicted pyruvyl transferase                                                | 100                             |
| A_07_P032038     | 2017901                    | ECD_01952                    | wzxC      | wzxC                  |                 | 3.83        | colanic acid exporter                                                        | 100                             |
| A_07_P015554     | 2019142                    | ECD_01953                    | wcaJ      | wcaJ                  |                 | 5.33        | predicted UDP-glucose lipid carrier transferase                              | 95                              |
| A_07_P015565     | 2022266                    | ECD_01955                    | cpsB      | cpsB                  |                 | 6.52        | mannose-1-phosphate guanyltransferase                                        | 98.21                           |
| A_07_P003030     | 2023603                    | ECD_01956                    | wcaI      | wcaI                  |                 | 11.6        | predicted glycosyl transferase                                               | 100                             |
| A_07_P003032     | 2024966                    | ECD_01957                    | wcaH      | gmm                   |                 | 7.33        | GDP-mannose mannosyl hydrolase                                               | 98.33                           |
| A_07_P003038     | 2025980                    | ECD_01958                    | wcaG      | fcl                   |                 | 11.26       | bifunctional GDP-fucose synthetase: GDP-4-dehydro-6-deoxy-D-mannose ep       | 100                             |
| A_07_P063301     | 2026627                    | ECD_01959                    | gmd       | ECs2858               |                 | 6.51        | GDP-D-mannose dehydratase, NAD(P)-binding                                    | 98.31                           |
| A_07_P045078     | 2027592                    | ECD_01960                    | wcaF      | wcaF                  |                 | 10.78       | predicted acyl transferase                                                   | 98.31                           |
| A_07_P003051     | 2027981                    | ECD_01961                    | wcaE      | wcaE                  |                 | 19.46       | predicted glycosyl transferase                                               | 100                             |
| A_07_P003060     | 2028812                    | ECD_01962                    | wcaD      | wcaD                  | 16.63           | 43.54       | predicted colanic acid polymerase                                            | 98.33                           |
| A_07_P003061     | 2030763                    | ECD_01963                    | wcaC      | wcaC                  |                 | 4.51        | predicted glycosyl transferase                                               | 96.67                           |
| A_07_P045081     | 2031353                    | ECD_01964                    | wcaB      | wcaB                  |                 | 6.65        | predicted acyl transferase                                                   | 98.33                           |
| A_07_P003074     | 2031687                    | ECD_01965                    | wcaA      | wcaA                  |                 | 10.16       | predicted glycosyl transferase                                               | 100                             |
| A_07_P003081     | 2034807                    | ECD_01967                    | wzb       | wzb                   |                 | 3.62        | protein-tyrosine phosphatase                                                 | 100                             |
| A_07_P032067     | 2036143                    | ECD_01968                    | wza       | c_2589                |                 | 12.91       | lipoprotein required for capsular polysaccharide translocation through the o | 98.18                           |
| A_07_P003154     | 2060046                    | ECD_01981                    | yegO      | mdtB                  |                 | 3.64        | multidrug efflux system, subunit C                                           | 89.47                           |
| A_07_P003195     | 2066192                    | ECD_02013                    | -         | b2084                 | 4.35            | 7.12        | conserved hypothetical protein; putative exported protein                    | 100                             |
| A_07_P003199     | 2066354                    | ECD_02014                    | yegR      | yegR                  | 5.52            | 8.27        | hypothetical protein                                                         | 100                             |
| A_07_P045133     | 2068051                    | ECD_02016                    | gatR      | gatR                  |                 | 3.25        | PSEUDOGENE -galactol utilization repressor - b2089                           | 95                              |
| A_07_P003211     | 2069363                    | ECD_04281                    | insB-29   | b2090                 | 4.24            |             | IS1 protein InsB                                                             | 100                             |
| A_07_P003220     | 2069886                    | ECD_02017                    | gatD      | gatD                  | 3.12            |             | galactitol-1-phosphate dehydrogenase, Zn-dependent and NAD(P)-binding        | 100                             |
| A_07_P003225     | 2070808                    | ECD_02018                    | gatC      | gatC                  | 2.34            | 3.79        | galactitol-specific enzyme IIC component of PTS                              | 100                             |
| A_07_P003229     | 2072182                    | ECD_02019                    | gatB      | gatB                  | 5.33            | 6.46        | galactitol-specific enzyme IIB component of PTS                              | 100                             |
| A_07_P003233     | 2072547                    | ECD_02020                    | gatA      | gatA                  | 6.19            | 5.22        | galactitol-specific enzyme IIA component of PTS                              | 100                             |
| A_07_P042502     | 2072918                    | ECD_02021                    | gatZ      | gatZ                  | 3.63            |             | putative tagatose 6-phosphate kinase 1                                       | 100                             |
| A_07_P003356     | 2100085                    | ECD_02048                    | yehL      | yehL                  |                 | 19.04       | predicted transporter subunit: ATP-binding component of ABC superfamily      | 100                             |
| A_07_P055787     | 2101568                    | ECD_02049                    | yehM      | ECs2928               |                 | 5.75        | hypothetical protein                                                         | 98.33                           |
| A_07_P003491     | 2129251                    | ECD_02075                    | yeiT      | yeiT                  | 1.99            | 4.51        | predicted oxidoreductase                                                     | 100                             |
| A_07_P003507     | 2132732                    | ECD_02078                    | mgIA      | mgIA                  | 4.3             | 2.07        | fused methyl-galactoside transporter subunits of ABC superfamily: ATP-bind   | 100                             |
| A_07_P000722     | 2177537                    | ECD_02115                    | rplY      | rplY                  |                 | 3.51        | 50S ribosomal protein L25                                                    | 100                             |
| A_07_P001070     | 2260884                    | ECD_02182                    | yfbH      | arnD                  |                 | -3.36       | hypothetical protein                                                         | 100                             |
| A_07_P001133     | 2273869                    | ECD_02196                    | elaD      | elaD                  | 4.31            | 5.89        | predicted enzyme                                                             | 98.33                           |
| A_07_P001148     | 2275604                    | ECD_02198                    | yfbM      | yfbM                  |                 | 3.97        | predicted enzyme                                                             | 100                             |
| A_07_P013721     | 2291462                    | ECD_02212                    | nuoB      | nuoB                  | 3.46            |             | NADH dehydrogenase subunit B                                                 | 100                             |
| A_07_P013728     | 2292021                    | ECD_02213                    | nuoA      | nuoA                  | 3.01            |             | NADH dehydrogenase subunit A                                                 | 100                             |
| A_07_P013976     | 2341027                    | ECD_02262                    | yfcTU     | yfcU                  | 5.03            |             | predicted outer membrane export usher protein                                | 96.67                           |
| A_07_P053274     | 2351064                    | ECD_02269                    | yfdF      | ECs3228               | 6.21            | 5.44        | PSEUDOGEN - similar to b2345                                                 | 92.59                           |
| A_07_P014013     | 2352091                    | ECD_02271                    | insA-18   | yfdF                  | 5.73            | 8.51        | IS1 protein InsA                                                             | 93.33                           |
| A_07_P014116     | 2358656                    | ECD_02277                    | emrY      | emrY                  | 4.52            | 4.58        | predicted multidrug efflux system                                            | 100                             |
| A_07_P014123     | 2360159                    | ECD_02278                    | emrK      | emrK                  | 4.45            | 2.98        | EmrKY-TolC multidrug resistance efflux pump, membrane fusion protein con     | 100                             |
| A_07_P014130     | 2362046                    | ECD_02279                    | evgA      | evgA                  | 20.68           | 15.46       | DNA-binding response regulator in two-component regulatory system with E     | 100                             |

| AGILENT PROBE ID | POSITION OF PROBE START IN |                              | GENE NAME | ALTERNATIVE GENE NAME | FOLD CHANGE     | FOLD               | GENE PRODUCT DESCRIPTION                                                   | PROBE IDENTITY TO BL21 SEQUENCE |
|------------------|----------------------------|------------------------------|-----------|-----------------------|-----------------|--------------------|----------------------------------------------------------------------------|---------------------------------|
|                  | BL21(DE3) GENOME           | LOCUS ID IN BL21(DE3) GENOME |           |                       | FIVE POINT FIVE | CHANGE HNS (1to64) |                                                                            |                                 |
|                  |                            |                              |           |                       |                 |                    |                                                                            |                                 |
| A_07_P014135     | 2365796                    | ECD_02280                    | evgS      | evgS                  | 6.62            | 1.69               | hybrid sensory histidine kinase in two-component regulatory system with Ev | 100                             |
| A_07_P014141     | 2367623                    | ECD_02282                    | yfdV      | yfdV                  | 16.91           | 8.1                | predicted transporter                                                      | 100                             |
| A_07_P014150     | 2368203                    | ECD_02283                    | yfdU      | oxc                   |                 | 4.76               | hypothetical protein                                                       | 100                             |
| A_07_P014154     | 2370045                    | ECD_02284                    | yfdW      | frc                   | 6.27            | 10.42              | formyl-coenzyme A transferase                                              | 100                             |
| A_07_P014160     | 2371821                    | ECD_02285                    | yfdX      | yfdX                  |                 | 3.35               | hypothetical protein                                                       | 100                             |
| A_07_P030085     | 2421826                    | ECD_02332                    | yfeY      | yfeY                  | 1.72            | -4.85              | hypothetical protein                                                       | 100                             |
| A_07_P013411     | 2455852                    | ECD_02362                    | yffb      | yffb                  |                 | 4.45               | hypothetical protein                                                       | 100                             |
| A_07_P013443     | 2462429                    | ECD_02369                    | nlpB      | bamC                  | 5.25            | -3.93              | lipoprotein                                                                | 100                             |
| A_07_P013551     | 2486440                    | ECD_02391                    | purM      | purM                  |                 | -3.41              | phosphoribosylaminoimidazole synthetase                                    | 96.67                           |
| A_07_P013578     | 2493816                    | ECD_02396                    | yfgG      | yfgG                  | 3.22            | 12.95              | hypothetical protein                                                       | 100                             |
| A_07_P013581     | 2494730                    | ECD_02397                    | yfgH      | yfgH                  |                 | 6.46               | predicted outer membrane lipoprotein                                       | 100                             |
| A_07_P019755     | 2574136                    | ECD_02464                    | rseC      | rseC                  |                 | -3.62              | RseC protein involved in reduction of the SoxR iron-sulfur cluster         | 98.33                           |
| A_07_P019758     | 2574622                    | ECD_02465                    | rseB      | rseB                  |                 | -3.93              | periplasmic negative regulator of sigmaE                                   | 100                             |
| A_07_P041262     | 2632786                    | ECD_02518                    | gabT      | gabT                  | -3.97           |                    | 4-aminobutyrate aminotransferase                                           | 98                              |
| A_07_P020199     | 2638271                    | ECD_02525                    | stpA      | stpA                  |                 | 18.89              | DNA binding protein, nucleoid-associated                                   | 100                             |
| A_07_P009676     | 2642703                    | ECD_02531                    | nrdE      | pagP                  | 24.62           | 11.64              | ribonucleotide-diphosphate reductase alpha subunit                         | 100                             |
| A_07_P030555     | 2645572                    | ECD_02533                    | proV      | proV                  |                 | 6.77               | glycine betaine transporter subunit                                        | 98.33                           |
| A_07_P001861     | 2646019                    | ECD_02534                    | proW      | proW                  |                 | 3.54               | glycine betaine transporter subunit                                        | 100                             |
| A_07_P030557     | 2647364                    | ECD_02535                    | proX      | proX                  | 18.79           |                    | glycine betaine transporter subunit                                        | 93.33                           |
| A_07_P055986     | 2665904                    | ECD_02552                    | srlA      | ECs3559               |                 | 6.04               | glucitol/sorbitol-specific enzyme IIC component of PTS                     | 100                             |
| A_07_P002256     | 2719879                    | ECD_02607                    | cysH      | cysH                  |                 | -5.17              | phosphoadenosine phosphosulfate reductase                                  | 96.67                           |
| A_07_P000282     | 2763426                    | ECD_02642                    | sdaB      | b3111                 |                 | -3.35              | L-serine deaminase II                                                      | 87.76                           |
| A_07_P006006     | 2774572                    | ECD_02653                    | fucl      | fucl                  | 4.02            |                    | L-fucose isomerase                                                         | 96.67                           |
| A_07_P006090     | 2794543                    | ECD_02669                    | ptr       | ptrA                  |                 | -3.51              | protease III                                                               | 100                             |
| A_07_P006347     | 2845290                    | ECD_02709                    | yqeC      | yqeC                  | 5.93            | 2.59               | hypothetical protein                                                       | 100                             |
| A_07_P045631     | 2846335                    | ECD_02710                    | ygfJ      | ygfJ                  |                 | 3.32               | hypothetical protein                                                       | 96.67                           |
| A_07_P056285     | 2867665                    | ECD_02724                    | recJ      | ECs3764               |                 | -3.43              | ssDNA exonuclease, 5' -> 3'-specific                                       | 98.33                           |
| A_07_P006489     | 2880337                    | ECD_02736                    | gcvH      | gcvH                  | 3.39            |                    | glycine cleavage system protein H                                          | 100                             |
| A_07_P011811     | 2908449                    | ECD_02763                    | cmtA      | cmtA                  |                 | 5.31               | predicted fused mannitol-specific PTS enzymes: IIB component/IIC compone   | 100                             |
| A_07_P012057     | 3000905                    | ECD_02861                    | yghS      | yghS                  | 12.3            | 9.78               | predicted protein with nucleoside triphosphate hydrolase domain            | 100                             |
| A_07_P012065     | 3001698                    | ECD_02862                    | yghT      | yghT                  |                 | 4.8                | predicted protein with nucleoside triphosphate hydrolase domain            | 100                             |
| A_07_P012269     | 3039508                    | ECD_02899                    | ygiZ      | ygiZ                  |                 | 7.44               | conserved inner membrane protein                                           | 100                             |
| A_07_P012364     | 3057631                    | ECD_02918                    | yqil      | yqil                  | 13.84           | 5.21               | hypothetical protein                                                       | 100                             |
| A_07_P012366     | 3057929                    | ECD_02919                    | glgS      | glgS                  |                 | 3.94               | glycogen synthesis protein GlgS                                            | 100                             |
| A_07_P012375     | 3058760                    | ECD_02920                    | yqiJ      | yqiJ                  | 3.31            | 6.48               | predicted inner membrane protein                                           | 100                             |
| A_07_P059659     | 3128810                    | ECD_02982                    | tdcD      | ECs3995               | 21.32           | 4.04               | propionate kinase/acetate kinase C, anaerobic                              | 98.33                           |
| A_07_P000306     | 3130049                    | ECD_02983                    | tdcC      | tdcC                  | 10.08           | 3.55               | L-threonine/L-serine transporter                                           | 100                             |
| A_07_P000312     | 3131598                    | ECD_02984                    | tdcB      | tdcB                  | 14.83           | 8.24               | threonine dehydratase                                                      | 100                             |
| A_07_P000316     | 3132563                    | ECD_02985                    | tdcA      | tdcA                  | 17.57           | 7.58               | DNA-binding transcriptional activator                                      | 100                             |
| A_07_P058949     | 3133718                    | ECD_02986                    | tdcR      | ECs3999               |                 | 3.04               | DNA-binding transcriptional activator                                      | 96.67                           |
| A_07_P059662     | 3134558                    | ECD_02987                    | yhaB      | ECs4000               | 2.27            | 5.63               | hypothetical protein                                                       | 95                              |
| A_07_P000434     | 3156386                    | ECD_03009                    | yraH      | yraH                  |                 | 7.88               | predicted fimbrial-like adhesin protein                                    | 98.21                           |



| AGILENT PROBE ID | POSITION OF PROBE START IN |                              | GENE NAME | ALTERNATIVE GENE NAME | FOLD CHANGE     | FOLD               | GENE PRODUCT DESCRIPTION                                      | PROBE IDENTITY TO BL21 SEQUENCE |
|------------------|----------------------------|------------------------------|-----------|-----------------------|-----------------|--------------------|---------------------------------------------------------------|---------------------------------|
|                  | BL21(DE3) GENOME           | LOCUS ID IN BL21(DE3) GENOME |           |                       | FIVE POINT FIVE | CHANGE HNS (1to64) |                                                               |                                 |
| A_07_P063488     | 3157128                    | ECD_03010                    | yraI      | ECs4021               | 6.16            |                    | predicted periplasmic pilin chaperone                         | 96.67                           |
| A_07_P000590     | 3190802                    | ECD_03040                    | secG      | secG                  | 40.49           |                    | protein-export membrane protein                               | 100                             |
| A_07_P012734     | 3262623                    | ECD_03111                    | yhdA      | csrD                  |                 | -3.68              | conserved inner membrane protein                              | 100                             |
| A_07_P012787     | 3274099                    | ECD_03122                    | envR      | envR                  |                 | 3.34               | DNA-binding transcriptional regulator                         | 96.67                           |
| A_07_P013047     | 3317435                    | ECD_03175                    | gspC      | gspC                  | 6.13            | 3.28               | general secretory pathway component, cryptic                  | 100                             |
| A_07_P017847     | 3352288                    | ECD_03215                    | yhfC      | tsgA                  |                 | 4.6                | hypothetical protein                                          | 98.33                           |
| A_07_P017874     | 3359104                    | ECD_03220                    | yhfL      | yhfL                  |                 | 6.07               | conserved secreted peptide                                    | 100                             |
| A_07_P018236     | 3446114                    | ECD_03293                    | yhhZ      | yhhZ                  | 27.33           | 35.16              | hypothetical protein                                          | 100                             |
| A_07_P018241     | 3446414                    | ECD_03294                    | yrhA      | yrhA                  | 23.5            | 21.06              | hypothetical protein                                          | 100                             |
| A_07_P041848     | 3447354                    | ECD_03295                    | yrhB      | yrhB                  | 9.14            | 6.02               | hypothetical protein                                          | 96.67                           |
| A_07_P016274     | 3485596                    | ECD_03331                    | rhsB      | rhsD                  | 89.48           | 228.19             | rhsB element core protein RshB                                | 96.88                           |
| A_07_P007353     | 3486054                    | ECD_03332                    | yhhH      | yhhH                  | 21.2            | 29.08              | hypothetical protein                                          | 100                             |
| A_07_P054163     | 3487608                    | ECD_03334                    | yhhI      | ECs0602               | 18.21           | 12.17              | predicted transposase                                         | 94.64                           |
| A_07_P007380     | 3493529                    | ECD_03338                    | yhiJ      | yhiJ                  | 14.01           | 11.68              | hypothetical protein                                          | 100                             |
| A_07_P007381     | 3495399                    | ECD_03339                    | yhiKL     | b3489                 | 11.75           | 31.07              | hypothetical protein                                          | 100                             |
| A_07_P007460     | 3514326                    | ECD_03353                    | yhiS      | yhiS                  | 4.07            | 5.25               | hypothetical protein                                          | 100                             |
| A_07_P007464     | 3515520                    | ECD_03354                    | slp       | slp                   | 5.82            | 13.84              | outer membrane lipoprotein                                    | 100                             |
| A_07_P007468     | 3516337                    | ECD_03355                    | yhiF      | dctR                  | 4.36            | 2.24               | predicted DNA-binding transcriptional regulator               | 100                             |
| A_07_P007477     | 3517378                    | ECD_03357                    | hdeB      | hdeB                  | 3.68            | 3.61               | acid-resistance protein                                       | 100                             |
| A_07_P007483     | 3517755                    | ECD_03358                    | hdeA      | hdeA                  | 3.09            | 4.25               | stress response protein acid-resistance protein               | 100                             |
| A_07_P007490     | 3518317                    | ECD_03359                    | hdeD      | hdeD                  | 3.04            | 4.79               | acid-resistance membrane protein                              | 100                             |
| A_07_P007494     | 3520015                    | ECD_03360                    | yhiE      | gadE                  | 103.36          | 18.09              | DNA-binding transcriptional activator                         | 100                             |
| A_07_P007508     | 3525150                    | ECD_03363                    | yhiW      | gadW                  | 12.62           | 1.75               | DNA-binding transcriptional activator                         | 100                             |
| A_07_P007513     | 3526371                    | ECD_03364                    | gadX      | gadX                  | 65.58           | 50.69              | DNA-binding transcriptional dual regulator                    | 100                             |
| A_07_P007516     | 3528537                    | ECD_03365                    | gadA      | gadA                  |                 | 4.22               | glutamate decarboxylase A, PLP-dependent                      | 100                             |
| A_07_P007703     | 3581732                    | ECD_03405                    | yiaG      | yiaG                  | 3.66            |                    | predicted transcriptional regulator                           | 100                             |
| A_07_P007706     | 3582297                    | ECD_03406                    | cspA      | cspA                  |                 | 3.54               | major cold shock protein                                      | 100                             |
| A_07_P007744     | 3589631                    | ECD_03415                    | yiaB      | yiaB                  |                 | 3.42               | conserved inner membrane protein                              | 100                             |
| A_07_P016870     | 3618921                    | ECD_03440                    | yiaU      | yiaU                  | 8.49            | 6.01               | predicted DNA-binding transcriptional regulator               | 100                             |
| A_07_P016907     | 3629357                    | ECD_03448                    | rhsA      | rhsA                  | 4.42            | 4.24               | rhsA element core protein RshA                                | 100                             |
| A_07_P016913     | 3629605                    | ECD_03449                    | yibA      | yibA                  | 3.42            | 7.2                | lyase containing HEAT-repeat protein                          | 93.33                           |
| A_07_P016918     | 3630833                    | ECD_03450                    | yibJ      | yibJ                  | 23.05           | 30.9               | predicted Rhs-family protein                                  | 100                             |
| A_07_P016924     | 3631545                    | ECD_03451                    | yibG      | yibG                  | 23.71           | 22.66              | hypothetical protein                                          | 100                             |
| A_07_P052196     | 3634782                    | ECD_03453                    | yiaI      | yiaW                  |                 | 3.42               | predicted inner membrane protein                              | 86.67                           |
| A_07_P049535     | 3641304                    | ECD_03459                    | -         | Z5028                 | 5.03            | 6.29               | conserved hypothetical protein                                | 93.33                           |
| A_07_P017019     | 3658437                    | ECD_03473                    | yibD      | yibD                  | 16.91           | 6.57               | predicted glycosyl transferase                                | 100                             |
| A_07_P039781     | 3666611                    | ECD_03480                    | waaV      | waaV                  | 5.64            | 2.41               | putative beta1,3-glucosyltransferase                          | 100                             |
| A_07_P039787     | 3667504                    | ECD_03481                    | waaW      | c_4450                | 6.79            | 3.38               | UDP-galactose:(Galactosyl) LPS alpha1,2-galactosyltransferase | 98.33                           |
| A_07_P017198     | 3691582                    | ECD_03508                    | trmH      | trmH                  |                 | -3.9               | tRNA (Guanosine-2'-O-)-methyltransferase                      | 100                             |
| A_07_P039883     | 3705963                    | ECD_03517                    | -         | c_4492                | 11.01           | 13.33              | ShiA-like protein                                             | 100                             |
| A_07_P039893     | 3707284                    | ECD_03519                    | -         | c_4494                | 18.89           | 6.44               | putative transcriptional regulator                            | 100                             |
| A_07_P039898     | 3709535                    | ECD_03520                    | -         | c_4495                | 17.23           | 7.54               | conserved hypothetical protein                                | 98.33                           |

| AGILENT PROBE ID | POSITION OF PROBE START IN |                              | GENE NAME | ALTERNATIVE GENE NAME | FOLD CHANGE     | FOLD CHANGE | GENE PRODUCT DESCRIPTION                                                  | PROBE IDENTITY TO BL21 SEQUENCE |
|------------------|----------------------------|------------------------------|-----------|-----------------------|-----------------|-------------|---------------------------------------------------------------------------|---------------------------------|
|                  | BL21(DE3) GENOME           | LOCUS ID IN BL21(DE3) GENOME |           |                       | FIVE POINT FIVE | HNS (1to64) |                                                                           |                                 |
| A_07_P039905     | 3710277                    | ECD_03521                    | -         | c_4496                | 28.82           | 7.05        | conserved hypothetical protein                                            | 100                             |
| A_07_P038017     | 3716273                    | ECD_03528                    | -         | c_5198                | 8.35            | 12.41       | PSEUDOGENE - in frame stop - transposase (fragment)                       | 96.67                           |
| A_07_P048749     | 3720380                    | ECD_03532                    | -         | L7023                 | 24.22           | 7.22        | hypothetical protein                                                      | 96.43                           |
| A_07_P055150     | 3721457                    | ECD_03535                    | ykgN      | ECs2648               | 4.1             | 2.03        | predicted IS protein                                                      | 100                             |
| A_07_P007989     | 3722353                    | ECD_03536                    | insl      | insl                  | 4.81            |             | IS30 transposase                                                          | 100                             |
| A_07_P036562     | 3722847                    | ECD_03537                    | -         | c_3677                | 4.05            |             | putative uncharacterized protein, yeeV-like protein                       | 100                             |
| A_07_P017232     | 3726269                    | ECD_03542                    | yicK      | setC                  | 9.64            | 3.64        | predicted sugar efflux system                                             | 100                             |
| A_07_P057595     | 3731302                    | ECD_03548                    | yicO      | ECs4601               |                 | 4.26        | predicted xanthine/uracil permease                                        | 96.72                           |
| A_07_P017261     | 3732999                    | ECD_03549                    | ade       |                       |                 | 14.47       | cryptic adenine deaminase                                                 | 100                             |
| A_07_P017334     | 3749432                    | ECD_03564                    | yidL      | yidL                  |                 | 3.23        | predicted DNA-binding transcriptional regulator                           | 100                             |
| A_07_P017370     | 3755916                    | ECD_03570                    | ibpA      | ibpA                  |                 | 3.85        | heat shock chaperone                                                      | 100                             |
| A_07_P057646     | 3778874                    | ECD_03592                    | tnaA      | tnaA                  | 4.83            |             | tryptophanase/L-cysteine desulfhydrase, PLP-dependent                     | 98.33                           |
| A_07_P005540     | 3794847                    | ECD_03607                    | bglG      | bglG                  | 98.84           | 8.72        | transcriptional antiterminator of the bgl operon                          | 98.33                           |
| A_07_P005587     | 3806567                    | ECD_03617                    | atpG      | atpG                  | 5.14            |             | F0F1 ATP synthase subunit gamma                                           | 100                             |
| A_07_P005591     | 3808084                    | ECD_03618                    | atpA      | atpA                  | 4.43            |             | F0F1 ATP synthase subunit alpha                                           | 100                             |
| A_07_P005596     | 3808799                    | ECD_03619                    | atpH      | atpH                  | 5.84            |             | F0F1 ATP synthase subunit delta                                           | 100                             |
| A_07_P005604     | 3809624                    | ECD_03620                    | atpF      | atpF                  | 4.04            |             | F0F1 ATP synthase subunit B                                               | 100                             |
| A_07_P005607     | 3809862                    | ECD_03621                    | atpE      | atpE                  | 6.84            |             | F0F1 ATP synthase subunit C                                               | 100                             |
| A_07_P005662     | 3823889                    | ECD_04285                    | insJ-6    | rbsD                  |                 | -4.64       | IS150 hypothetical protein                                                | 100                             |
| A_07_P005669     | 3825311                    | ECD_03635                    | rbsA      | rbsA                  | 4.45            | -9.39       | fused D-ribose transporter subunits of ABC superfamily: ATP-binding compo | 100                             |
| A_07_P005727     | 3842569                    | ECD_03647                    | ilvM      | ilvM                  | 9.24            |             | acetolactate synthase II, small subunit                                   | 100                             |
| A_07_P039071     | 3844794                    | ECD_03649                    | ilvD      | ilvD                  | 22.74           |             | dihydroxy-acid dehydratase                                                | 88.33                           |
| A_07_P005880     | 3877312                    | ECD_03677                    | hemY      | hemY                  |                 | -3.46       | predicted protoheme IX synthesis protein                                  | 98.33                           |
| A_07_P005885     | 3878608                    | ECD_03678                    | hemX      | hemX                  |                 | -3.51       | predicted uroporphyrinogen III methylase                                  | 100                             |
| A_07_P050009     | 3893867                    | ECD_03693                    | -         | Z5334                 | 16.57           | 8.41        | conserved hypothetical protein                                            | 100                             |
| A_07_P057752     | 3894270                    | ECD_03694                    | -         | ECs4747               | 22.84           | 6.7         | conserved hypothetical protein                                            | 100                             |
| A_07_P005951     | 3895380                    | ECD_03696                    | yigF      | yigF                  | 15.82           | 26.34       | conserved inner membrane protein                                          | 98.28                           |
| A_07_P005960     | 3895817                    | ECD_03697                    | yigG      | yigG                  | 31.86           | 36.83       | predicted inner membrane protein                                          | 100                             |
| A_07_P019225     | 3985888                    | ECD_03774                    | yiiE      | yiiE                  | 11.69           | 14.4        | predicted transcriptional regulator                                       | 100                             |
| A_07_P019227     | 3986440                    | ECD_03775                    | yiiF      | yiiF                  | 6.45            | 5.09        | hypothetical protein                                                      | 100                             |
| A_07_P047071     | 3994453                    | ECD_03781                    | yiiG      | yiiG                  |                 | 4.2         | hypothetical protein                                                      | 92.98                           |
| A_07_P047084     | 4001066                    | ECD_03786                    | -         | Z5444                 |                 | 4.24        | putative glycoporin                                                       | 98.33                           |
| A_07_P057873     | 4009036                    | ECD_03794                    | sodA      | ECs4834               | -1.63           | 3.08        | superoxide dismutase, Mn                                                  | 95                              |
| A_07_P019439     | 4029741                    | ECD_03817                    | hslV      | hslV                  | -3.54           | 3.15        | ATP-dependent protease peptidase subunit                                  | 100                             |
| A_07_P034350     | 4084911                    | ECD_03856                    | tufB      | c_4111                | 3.08            | 2.57        | protein chain elongation factor EF-Tu (duplicate of tufA)                 | 98.33                           |
| A_07_P008595     | 4088770                    | ECD_03862                    | rplL      | rplL                  | 3.46            |             | 50S ribosomal protein L7/L12                                              | 100                             |
| A_07_P008728     | 4128344                    | ECD_03889                    | arpA      | arpA                  | 7.66            | 3.89        | PSEUDOGENE - arpA - regulator of Acetyl-CoA synthetase - similar to b4017 | 100                             |
| A_07_P008773     | 4143279                    | ECD_03898                    | yjbE      | yjbE                  |                 | 4.13        | hypothetical protein                                                      | 100                             |
| A_07_P008811     | 4152888                    | ECD_03906                    | malE      | malE                  |                 | 3.77        | maltose ABC transporter periplasmic protein                               | 100                             |
| A_07_P008822     | 4156153                    | ECD_03908                    | lamB      | lamB                  | 1.67            | 6.46        | maltoporin precursor                                                      | 100                             |
| A_07_P047260     | 4159545                    | ECD_03910                    | yjbl      | yjbl                  | 7.17            | 3.17        | hypothetical protein                                                      | 91.67                           |
| A_07_P047264     | 4167172                    | ECD_03918                    | zur       | yjbK                  | 1.31            | 3.14        | DNA-binding transcriptional repressor, Zn(II)-binding                     | 100                             |

| AGILENT PROBE ID | POSITION OF PROBE START IN |                              | GENE NAME | ALTERNATIVE GENE NAME | FOLD CHANGE     | FOLD               | GENE PRODUCT DESCRIPTION                                                   | PROBE IDENTITY TO BL21 SEQUENCE |
|------------------|----------------------------|------------------------------|-----------|-----------------------|-----------------|--------------------|----------------------------------------------------------------------------|---------------------------------|
|                  | BL21(DE3) GENOME           | LOCUS ID IN BL21(DE3) GENOME |           |                       | FIVE POINT FIVE | CHANGE HNS (1to64) |                                                                            |                                 |
|                  |                            |                              |           |                       |                 |                    |                                                                            |                                 |
| A_07_P008880     | 4167880                    | ECD_03919                    | yjbL      | yjbL                  | 10.53           | 12.11              | hypothetical protein                                                       | 98.31                           |
| A_07_P047270     | 4168580                    | ECD_03920                    | yjbM      | Z5646                 | 6.97            | 7.15               | hypothetical protein                                                       | 100                             |
| A_07_P008972     | 4189273                    | ECD_03938                    | yjcF      | yjcF                  | 8.57            | 9.91               | PSEUDOGENE - yjcF - similar to b4066                                       | 96.67                           |
| A_07_P011282     | 4236227                    | ECD_03980                    | yjdA      | yjdA                  |                 | 3.85               | conserved protein with nucleoside triphosphate hydrolase domain            | 100                             |
| A_07_P011370     | 4258973                    | ECD_03997                    | yjdl      | yjdl                  |                 | 3.01               | hypothetical protein                                                       | 100                             |
| A_07_P011380     | 4259844                    | ECD_03999                    | yjdK      | yjdK                  | 7.68            | 5.1                | hypothetical protein                                                       | 100                             |
| A_07_P011393     | 4263616                    | ECD_04002                    | cadA      | cadA                  | 29.6            |                    | lysine decarboxylase 1                                                     | 100                             |
| A_07_P011396     | 4266018                    | ECD_04003                    | cadB      | cadB                  | 5.26            |                    | predicted lysine/cadaverine transporter                                    | 100                             |
| A_07_P011404     | 4267680                    | ECD_04004                    | cadC      | cadC                  | 19.12           | 3.42               | DNA-binding transcriptional activator                                      | 98.33                           |
| A_07_P011431     | 4275967                    | ECD_04010                    | fxsA      | fxsA                  | -2.17           | 3.8                | inner membrane protein                                                     | 96.67                           |
| A_07_P011443     | 4278003                    | ECD_04012                    | groES     | groS                  | -4.19           | 7.48               | co-chaperonin GroES                                                        | 100                             |
| A_07_P011446     | 4279243                    | ECD_04013                    | groEL     | groL                  | -2.43           | 4.35               | chaperonin GroEL                                                           | 98.33                           |
| A_07_P047353     | 4280841                    | ECD_04015                    | yjeJ      | yjeJ                  | 6.97            | 8.18               | hypothetical protein                                                       | 98.33                           |
| A_07_P011513     | 4291728                    | ECD_04028                    | yjeM      | yjeM                  |                 | 3.1                | predicted transporter                                                      | 100                             |
| A_07_P011571     | 4306527                    | ECD_04038                    | miaA      | miaA                  |                 | 3.12               | tRNA delta(2)-isopentenylpyrophosphate transferase                         | 100                             |
| A_07_P011623     | 4316983                    | ECD_04048                    | yjfl      | yjfl                  |                 | 5.56               | hypothetical protein                                                       | 100                             |
| A_07_P011630     | 4317307                    | ECD_04049                    | yjfJ      | yjfJ                  |                 | 4.87               | predicted transcriptional regulator effector protein                       | 100                             |
| A_07_P061590     | 4318358                    | ECD_04050                    | yjfK      | ECs5159               |                 | 3.99               | hypothetical protein                                                       | 100                             |
| A_07_P011636     | 4318747                    | ECD_04051                    | yjfl      | yjfl                  |                 | 5.83               | conserved inner membrane protein                                           | 100                             |
| A_07_P010658     | 4323081                    | ECD_04056                    | yjfo      | yjfo                  | 4.28            |                    | hypothetical protein                                                       | 100                             |
| A_07_P011720     | 4331777                    | ECD_04067                    | rpsF      | rpsF                  |                 | 4.63               | 30S ribosomal protein S6                                                   | 98.33                           |
| A_07_P011721     | 4332295                    | ECD_04068                    | priB      | priB                  | 2.01            | 4.39               | primosomal replication protein N                                           | 100                             |
| A_07_P011729     | 4332426                    | ECD_04069                    | rpsR      | rpsR                  | 2.32            | 3.89               | 30S ribosomal protein S18                                                  | 100                             |
| A_07_P011745     | 4341386                    | ECD_04077                    | ytfA      | ytfA                  | 9.24            | 3.81               | predicted transcriptional regulator                                        | 100                             |
| A_07_P003811     | 4387962                    | ECD_04119                    | yjgL      | yjgL                  | 4.89            | 5.13               | hypothetical protein                                                       | 96.67                           |
| A_07_P047400     | 4390530                    | ECD_04122                    | yjgM      | Z5868                 |                 | 13.55              | predicted acetyltransferase                                                | 100                             |
| A_07_P003831     | 4392255                    | ECD_04123                    | yjgN      | yjgN                  | 6.23            | 11.94              | conserved inner membrane protein                                           | 98.33                           |
| A_07_P003888     | 4406629                    | ECD_04134                    | idnK      | idnK                  |                 | 4.25               | D-gluconate kinase, thermosensitive                                        | 100                             |
| A_07_P003901     | 4409912                    | ECD_04137                    | yjgW      | b4274                 | 8.13            | 3.06               | predicted protein                                                          | 100                             |
| A_07_P003924     | 4412584                    | ECD_04140                    | insG      | insG                  |                 | -3.72              | IS4 predicted transposase                                                  | 100                             |
| A_07_P003926     | 4415372                    | ECD_04141                    | yjhB      | yjhB                  | 1.32            | 13.09              | predicted transporter                                                      | 100                             |
| A_07_P003931     | 4416588                    | ECD_04142                    | yjhC      | yjhC                  | 9.7             | 14.42              | predicted oxidoreductase                                                   | 100                             |
| A_07_P003942     | 4417281                    | ECD_04144                    | yjhE      | yjhE                  | 6.36            |                    | PSEUDOGENE -similar to b4282; predicted membrane protein                   | 100                             |
| A_07_P003998     | 4432042                    | ECD_04160                    | insA-25   | insA                  | 4.57            | 3.43               | IS1 protein InsA                                                           | 93.33                           |
| A_07_P005381     | 4432560                    | ECD_04161                    | insB-25   | insB                  | 5.09            | 1.85               | PSEUDOGENE - IS1 insB - interrupted by in-frame stop                       | 96.55                           |
| A_07_P004083     | 4447449                    | ECD_04178                    | yjhA      | nanC                  | 3.12            | 5.44               | N-acetylneuraminic acid outer membrane channel protein                     | 100                             |
| A_07_P004086     | 4449910                    | ECD_04179                    | fimB      | fimB                  | 3.85            | 5.61               | PSEUDOGENE - nterrupted by IS1; recombinase involved in phase variation; i | 92.59                           |
| A_07_P004095     | 4451827                    | ECD_04182                    | fimE      | fimE                  | 3.98            | 4.87               | tyrosine recombinase/inversion of on/off regulator of fimA                 | 100                             |
| A_07_P004109     | 4453885                    | ECD_04185                    | fimC      | fimC                  |                 | 3.86               | chaperone, periplasmic                                                     | 100                             |
| A_07_P047520     | 4464843                    | ECD_04194                    | yjiC      | yjiC                  | 19.98           | 10.5               | hypothetical protein                                                       | 100                             |
| A_07_P004159     | 4466346                    | ECD_04195                    | yjiD      | yjiD                  | 47.42           | 10.99              | DNA replication/recombination/repair protein                               | 100                             |
| A_07_P017421     | 4483429                    | ECD_04211                    | mcrC      | mcrC                  | 22.15           |                    | 5-methylcytosine-specific restriction enzyme McrBC, subunit McrC           | 98.25                           |

| AGILENT PROBE ID | POSITION OF PROBE START IN |                              | GENE NAME | ALTERNATIVE GENE NAME | FOLD CHANGE     | FOLD CHANGE | GENE PRODUCT DESCRIPTION                                         | PROBE IDENTITY TO BL21 SEQUENCE |
|------------------|----------------------------|------------------------------|-----------|-----------------------|-----------------|-------------|------------------------------------------------------------------|---------------------------------|
|                  | BL21(DE3) GENOME           | LOCUS ID IN BL21(DE3) GENOME |           |                       | FIVE POINT FIVE | HNS (1to64) |                                                                  |                                 |
| A_07_P017427     | 4484609                    | ECD_04212                    | mcrB      | mcrB                  | 21.44           | 4.13        | 5-methylcytosine-specific restriction enzyme McrBC, subunit McrB | 98.21                           |
| A_07_P037247     | 4486097                    | ECD_04213                    | yjiW      | yjiW                  | 7.3             | 5.33        | hypothetical protein                                             | 98.33                           |
| A_07_P017518     | 4520927                    | ECD_04241                    | yjjP      | yjjP                  |                 | 3.98        | predicted inner membrane protein                                 | 100                             |
| A_07_P042086     | 4522272                    | ECD_04242                    | yjjQ      | yjjQ                  | 17.84           | 10.46       | predicted DNA-binding transcriptional regulator                  | 100                             |
